# Supplementary material for: Selective colorimetric sensing of fluoride in an aqueous solution by amino-naphthoquinone and its Co(ii), Ni(ii), Cu(ii) and Zn(ii) complexes – effect of complex formation on sensing behaviour
Source: Royal Society of Chemistry journal article supplement (doi:10.1039/c6ra19309a), 2016-01-01
Supplement: c6ra19309a1.pdf [file c6ra19309a1.pdf]

## Selective colorimetric sensing of fluoride in aqueous solution by amino-naphthoquinone and its Co(II), Ni(II), Cu(II) and Zn(II) complexes – Effect of complex formation on sensing behaviour

C. Parthiban<sup>a</sup>, Samuele Ciattini<sup>b</sup>, Laura Chelazzi<sup>b</sup>, and Kuppanagounder P. Elango<sup>a\*</sup>

### Table of Content

**Fig. S1.** Crystal packing diagram of **R1**

**Fig. S2.** Scott-equation plot of Receptors (**R1-R5**) with F<sup>-</sup> ions

**Fig. S3.** UV-Vis absorbance intensity response of **R1-R5** upon addition of F<sup>-</sup> ions.

**Fig. S4.** Stern-volmer plot of Receptors (**R1-R5**) with F<sup>-</sup> ions

**Fig. S5.** Electron density distribution of HOMO and LUMO of the free Receptors and their F<sup>-</sup> ion complexes

**Fig. S6.** <sup>1</sup>H NMR spectrum of **R1**

**Fig. S7.** <sup>13</sup>C NMR spectrum of **R1**

**Fig. S8.** LCMS spectrum of **R1**

**Fig. S9.** IR spectra of receptors **R1-R5**

**Fig. S10.** EPR Spectrum of the Cu(II) Complex

**Fig. S11.** HRMS spectra of receptors **R2-R5**

**Table S1.** Crystal data and structure refinement of **R1**

**Table S2.** Bond lengths [Å] and angles [deg] for **R1**

**Table S3.** Theoretical data of the receptor and its Complexes

**Table S4.** Analytical and physical data of Receptors

**Table S5.** FT-IR spectral data of the **R1** and its complexes (cm<sup>-1</sup>)

**Characterization of metal complexes**

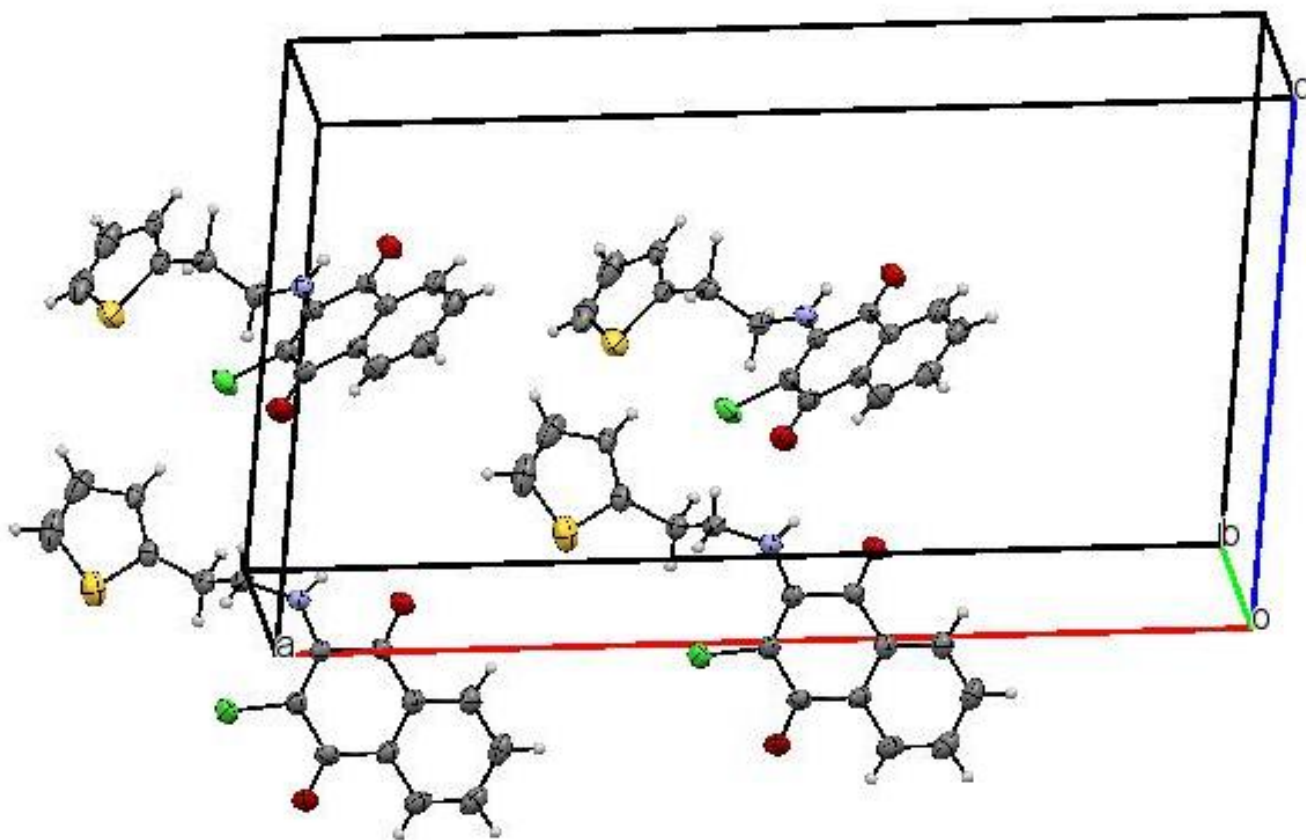

**Fig. S1.** Crystal packing diagram of **R1**

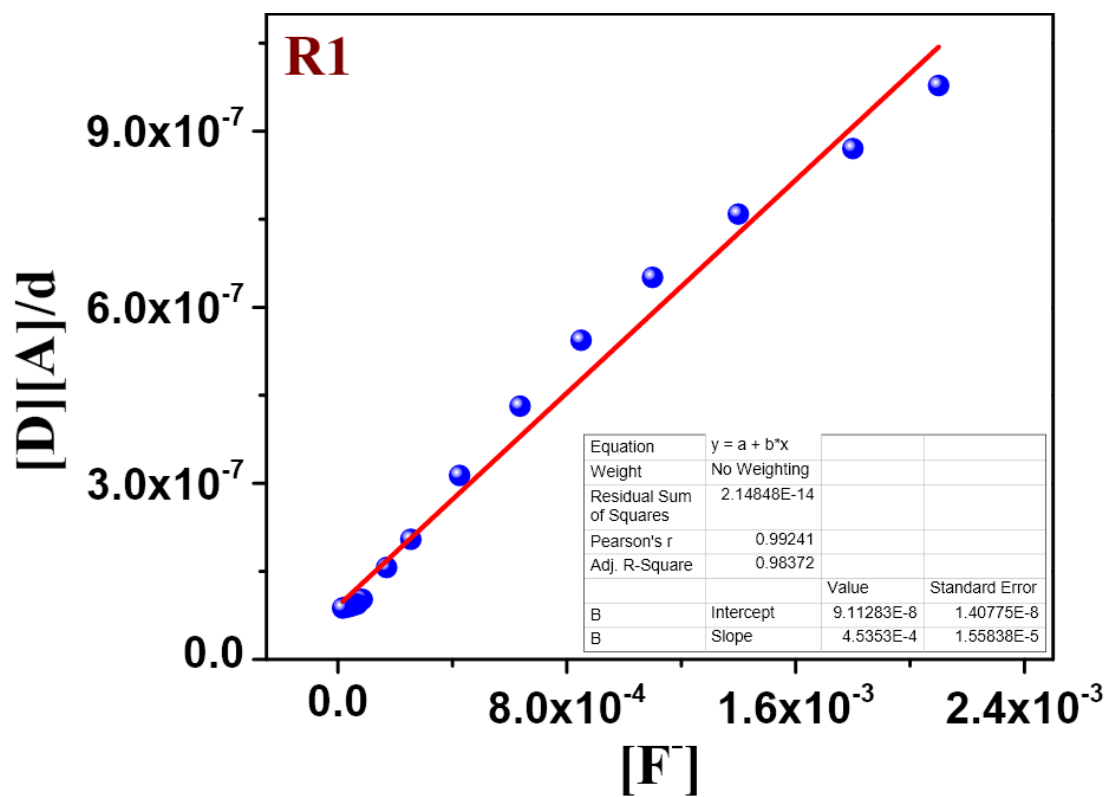

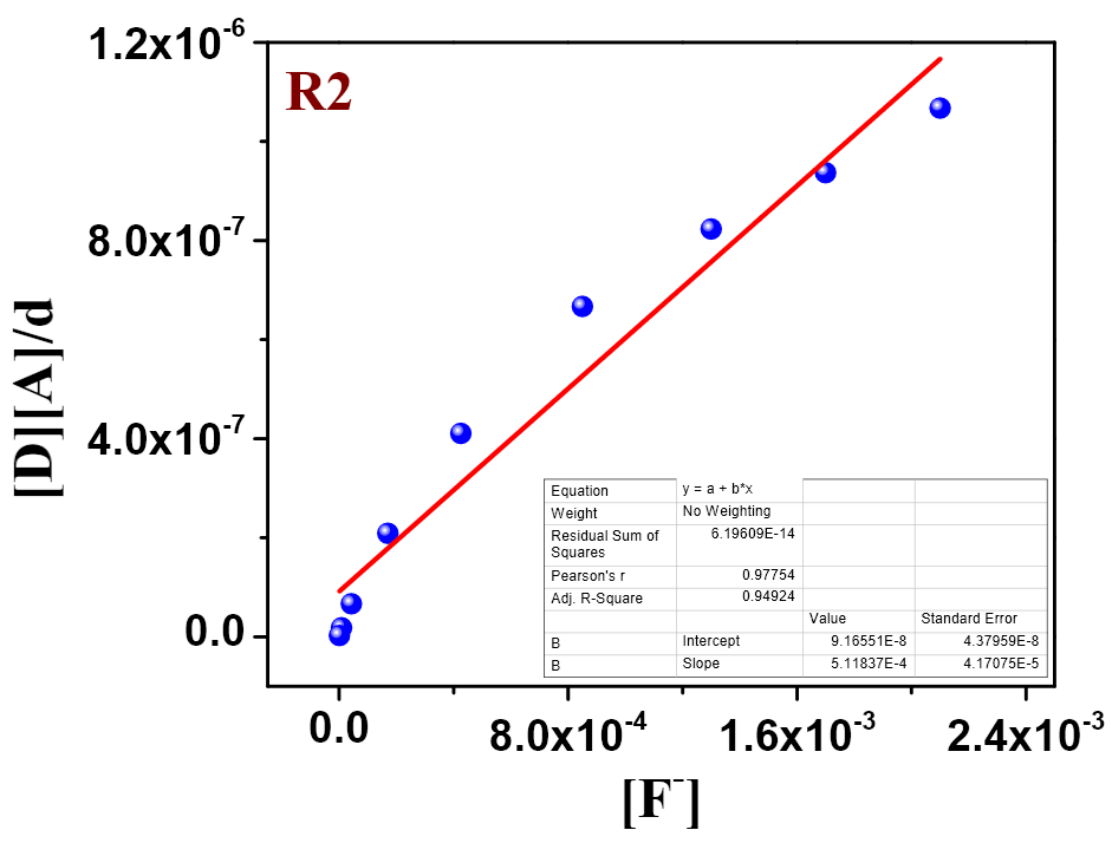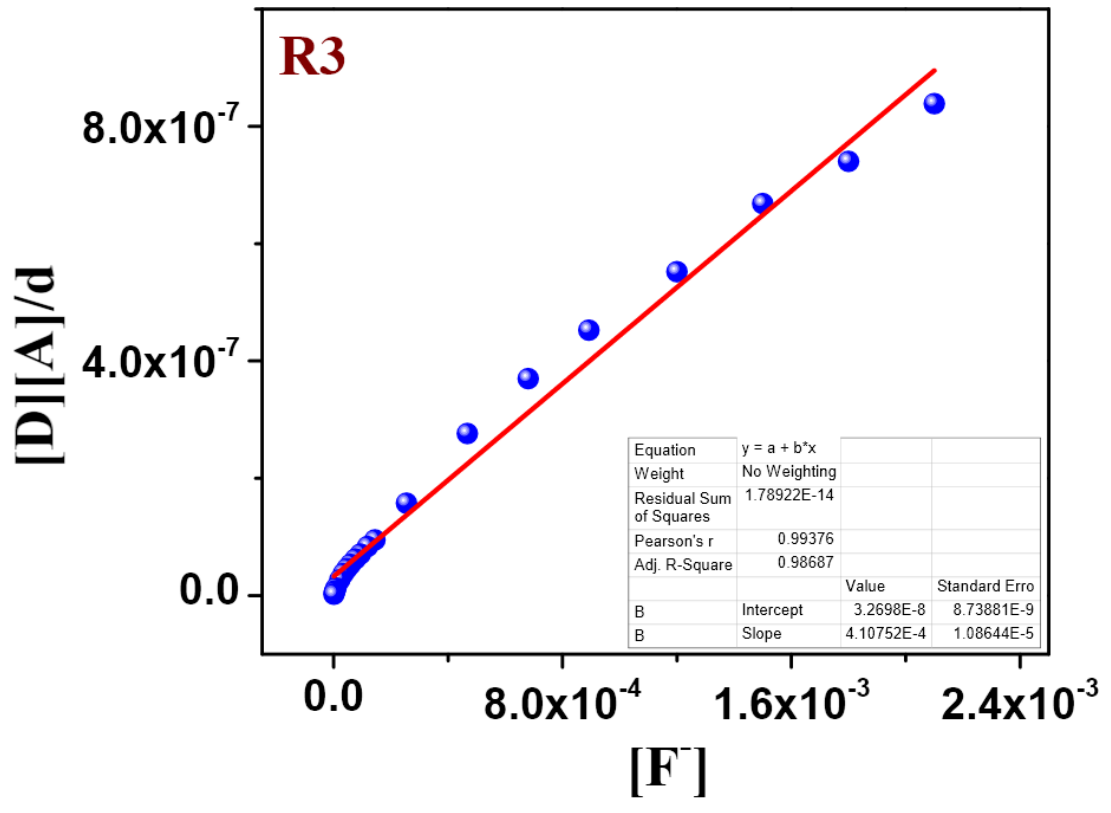

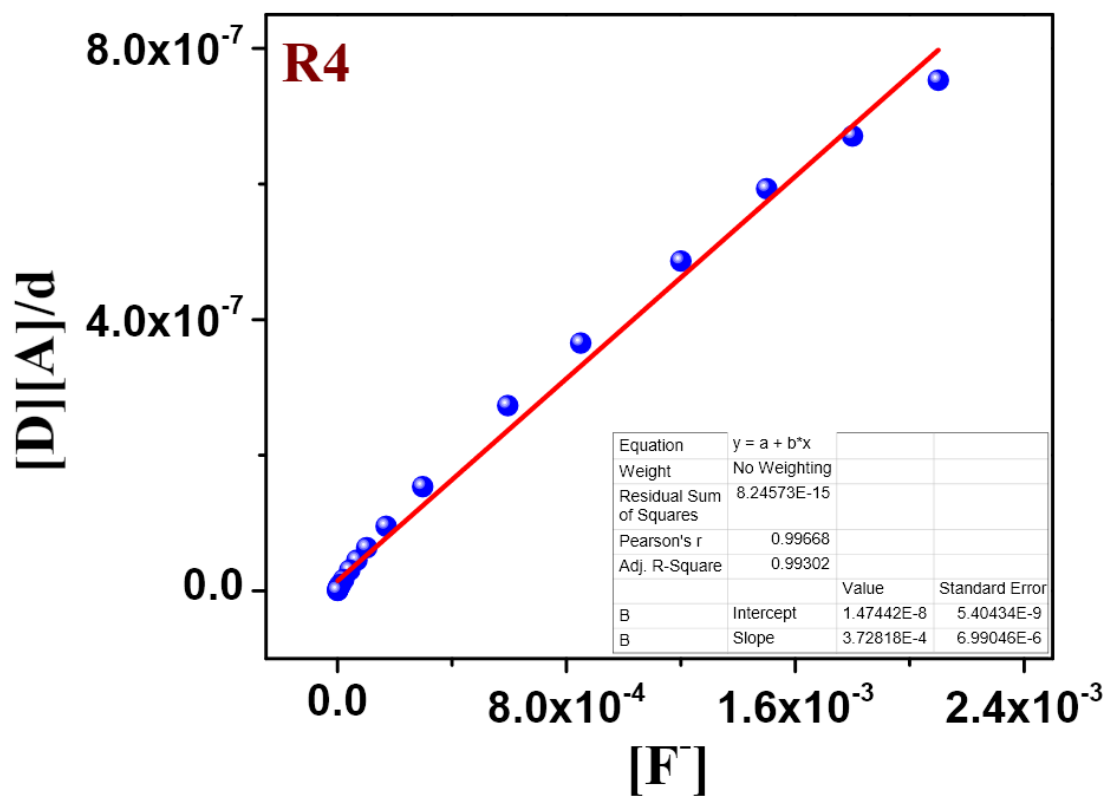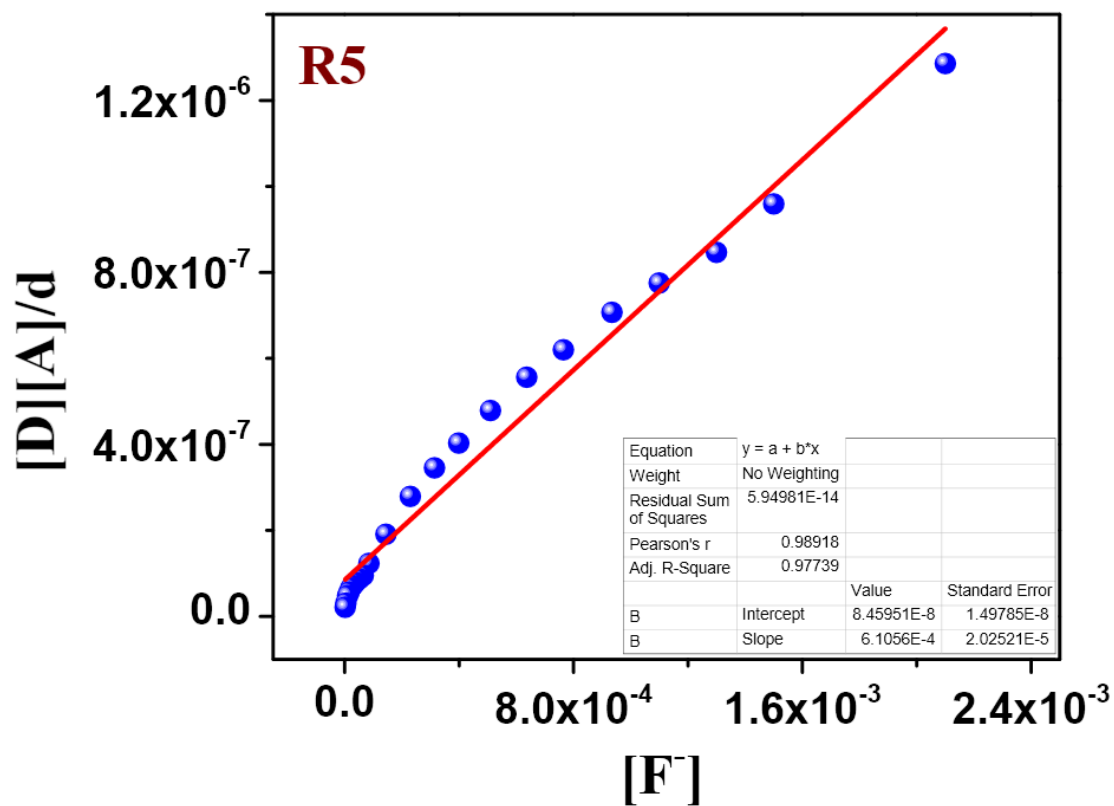

**Fig. S2.** Scott-equation plot of Receptors (**R1-R5**) with  $F^-$  ions.

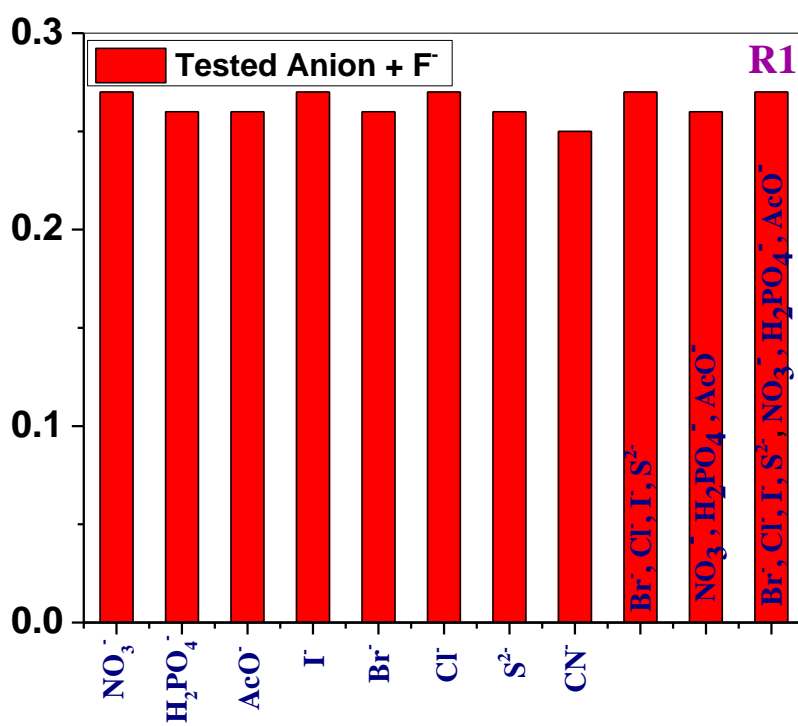

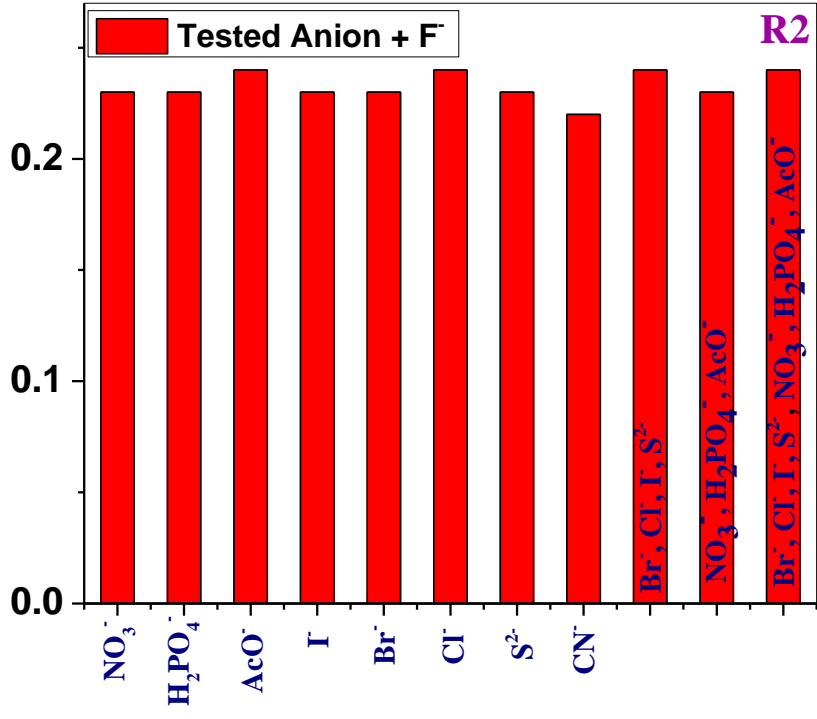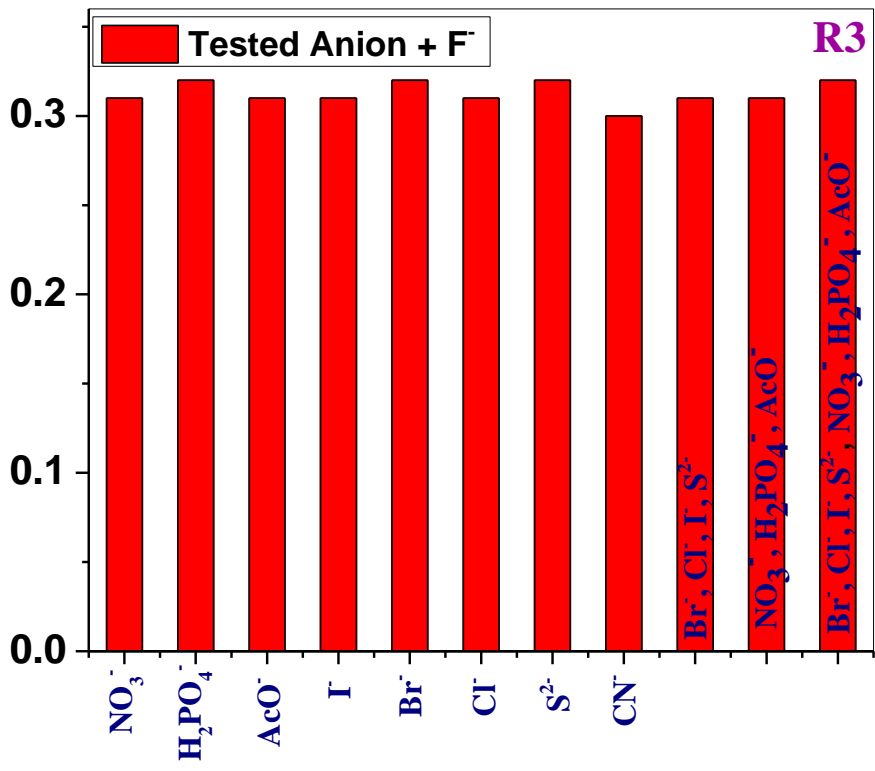

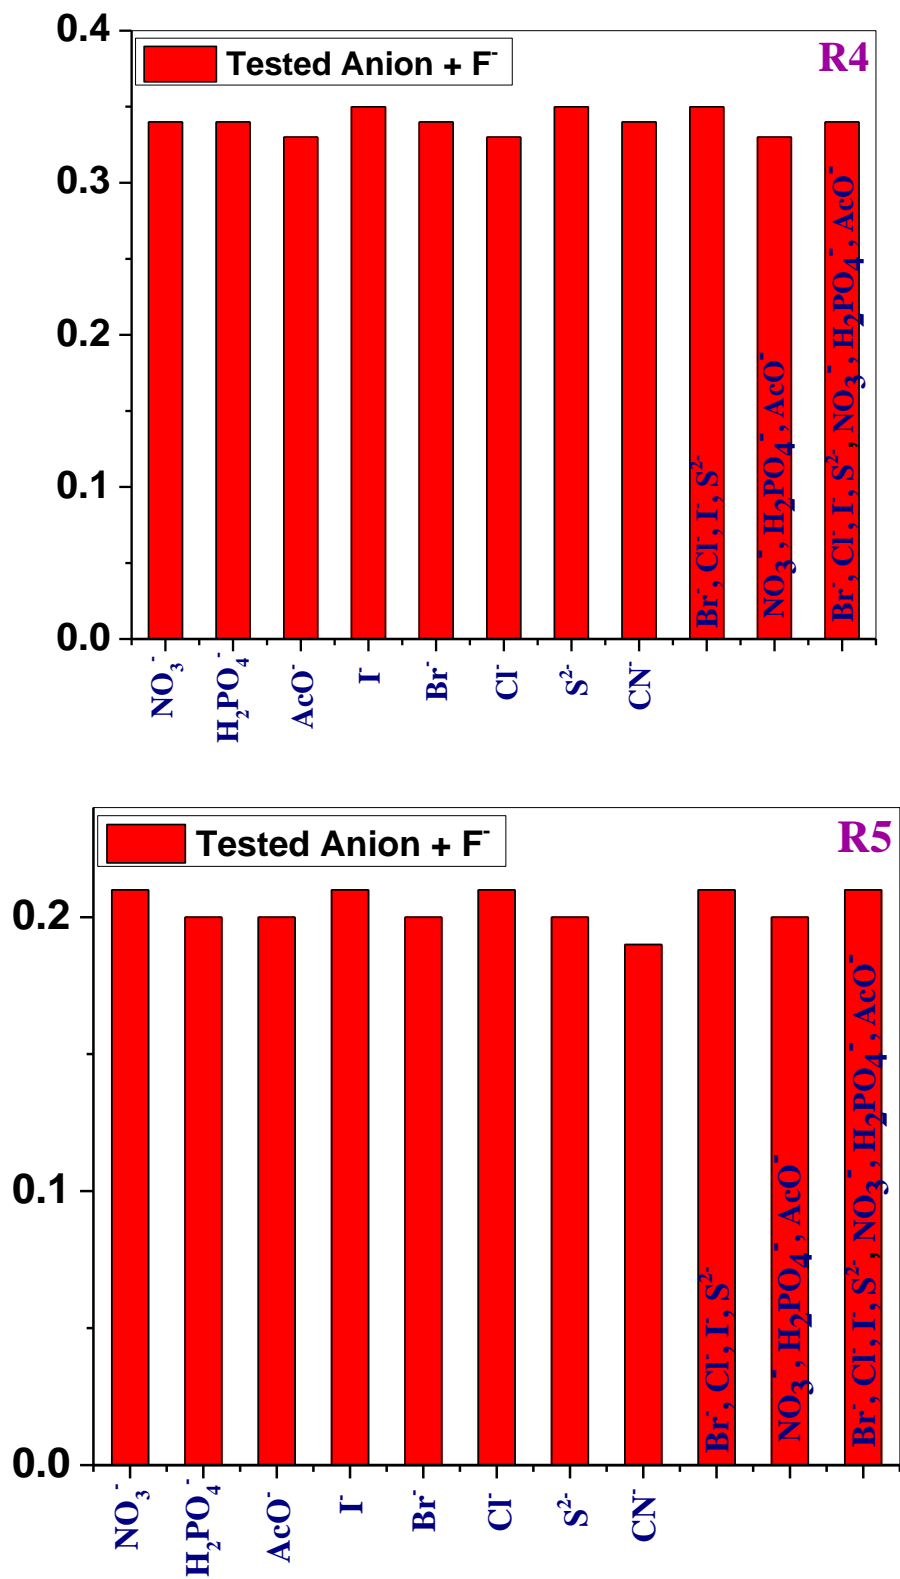

**Fig. S3.** UV-Vis absorbance intensity response of **R1-R5** upon addition of F<sup>-</sup> ions.



(R1 in DMF; R2, R3 and R5 in 50% aq. DMF and R4 in 70% aq. DMF solution)

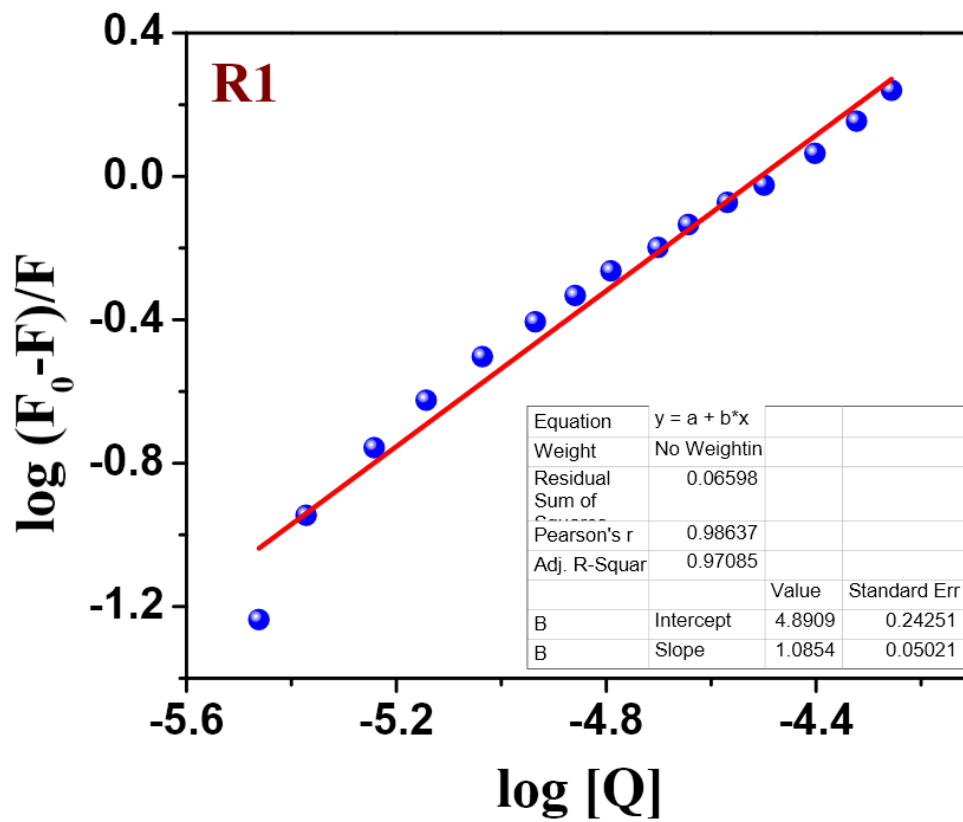

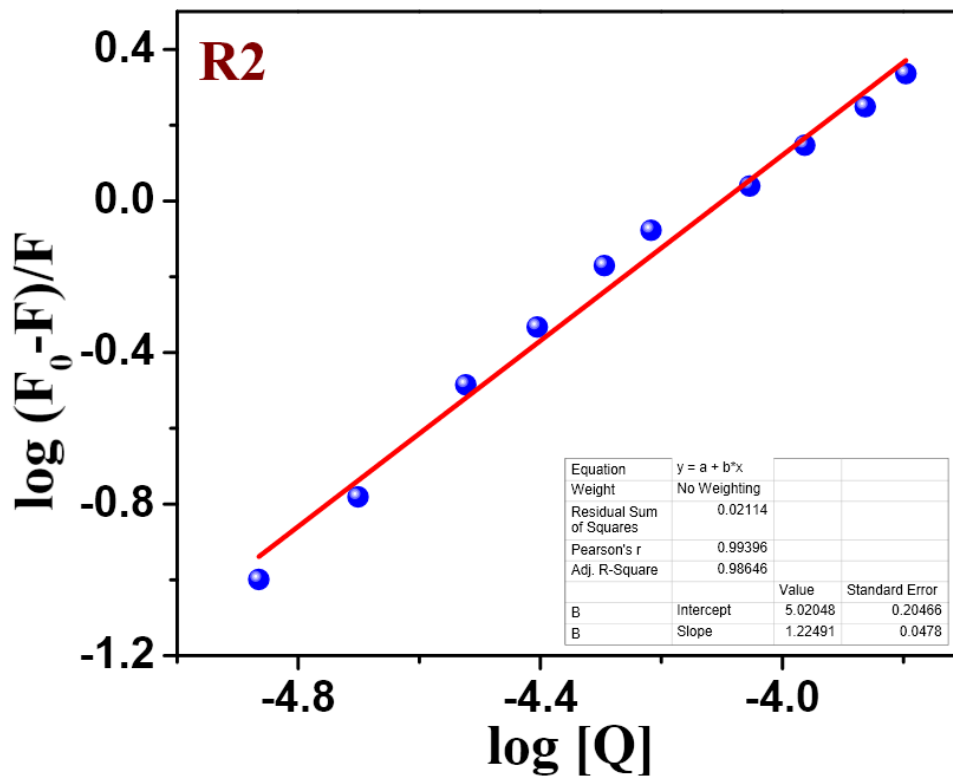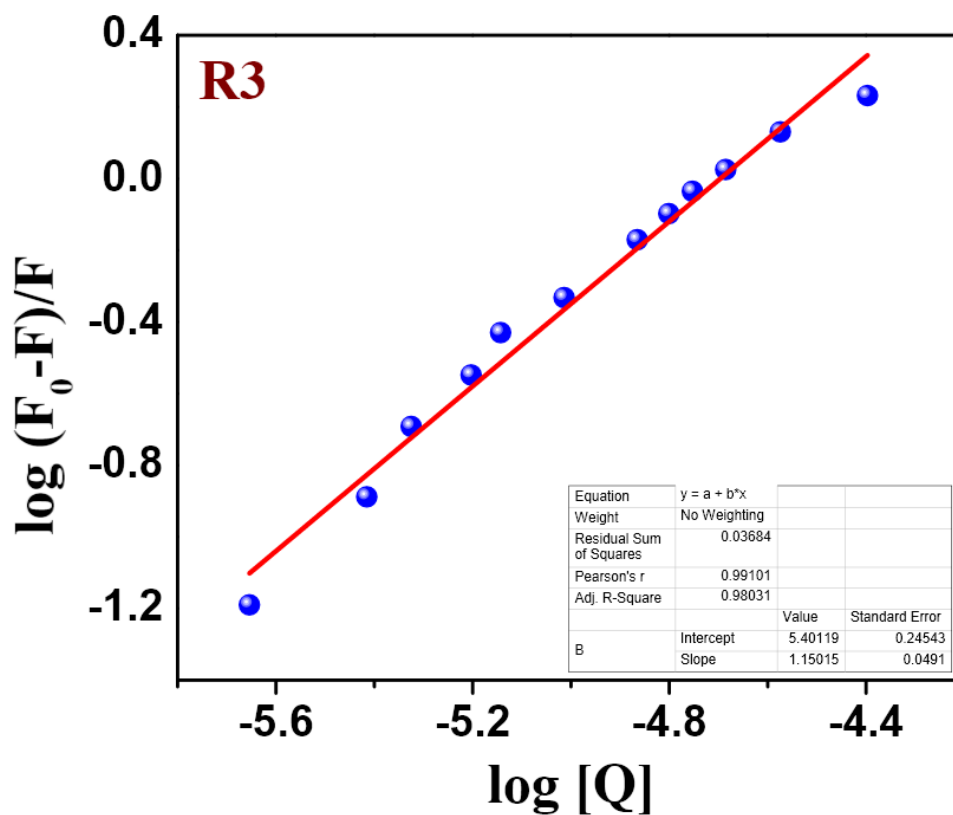

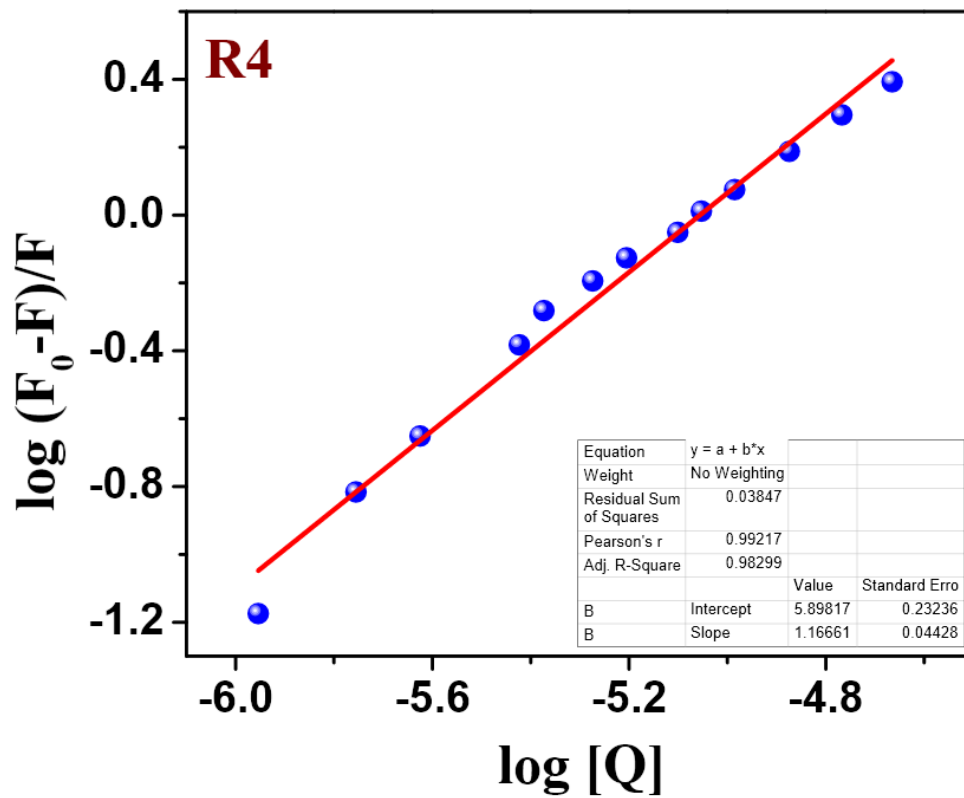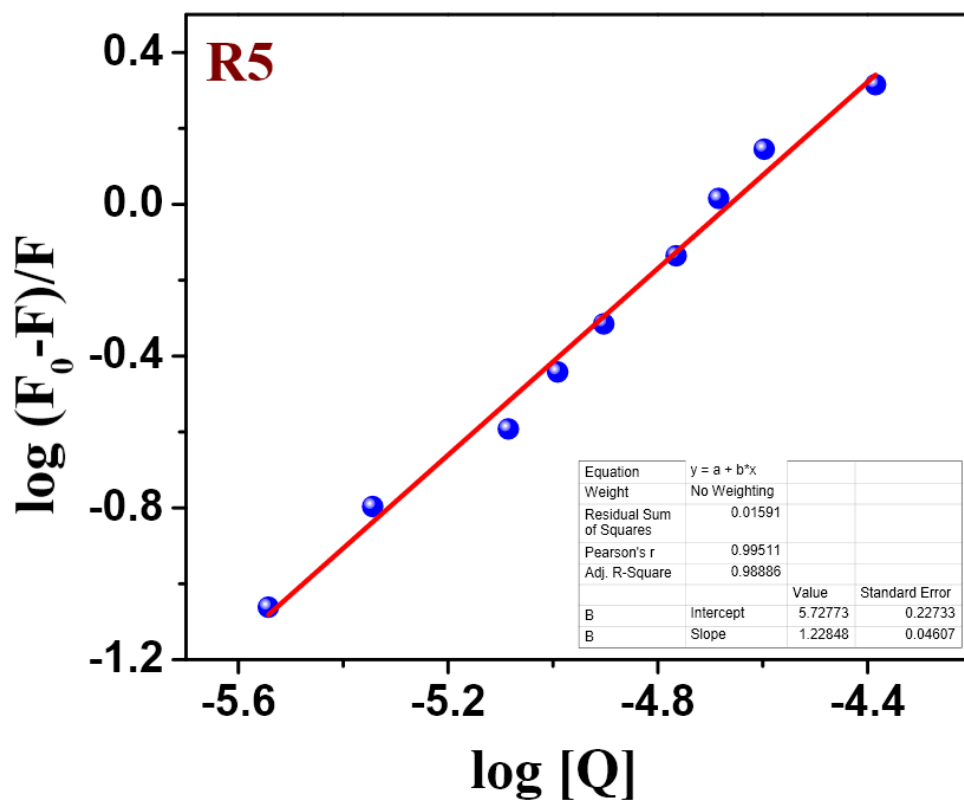

**Fig. S4.** Stern-volmer plot of Receptors (**R1-R5**) with F<sup>-</sup> ions.

LUMO of R1

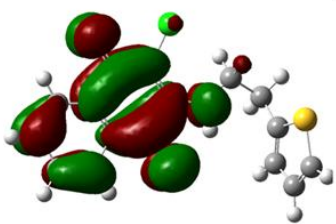

$$\updownarrow \Delta E = 2.8956$$

LUMO of R1+F<sup>-</sup>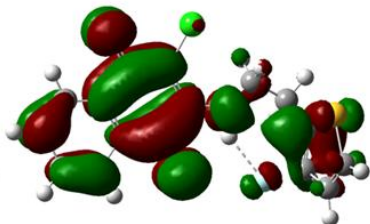

$$\updownarrow \Delta E = 2.6517$$

LUMO of R2

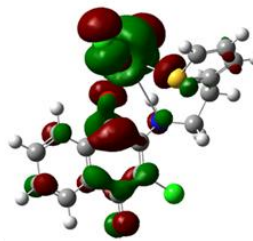

$$\updownarrow \Delta E = 2.2716$$

LUMO of R2+F<sup>-</sup>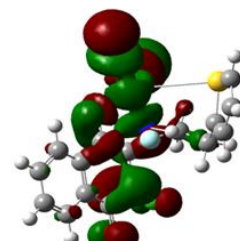

$$\updownarrow \Delta E = 1.6487$$

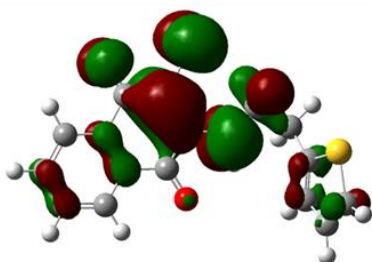

HOMO of R1

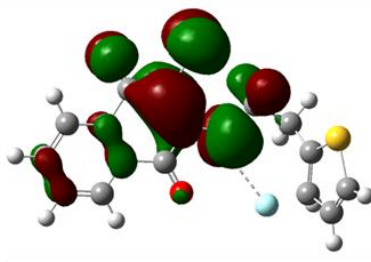HOMO of R1+F<sup>-</sup>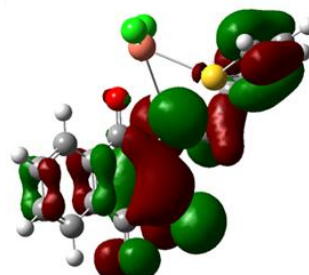

HOMO of R2

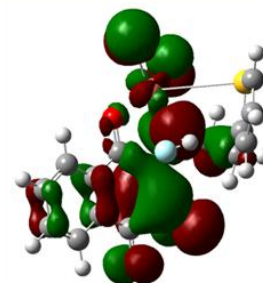HOMO of R2+F<sup>-</sup>

LUMO of R3

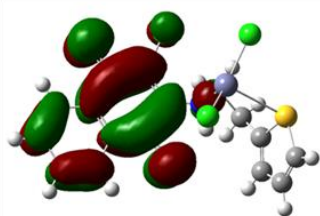

$$\updownarrow \Delta E = 2.5321$$

LUMO of R3+F<sup>-</sup>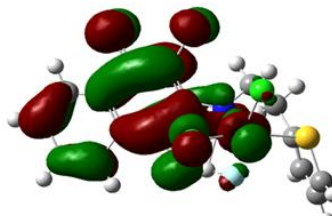

$$\updownarrow \Delta E = 2.3024$$

LUMO of R4

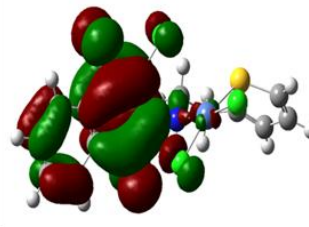

$$\updownarrow \Delta E = 2.1121$$

LUMO of R4+F<sup>-</sup>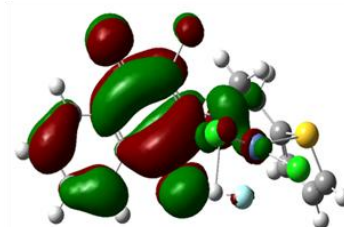

$$\updownarrow \Delta E = 1.4539$$

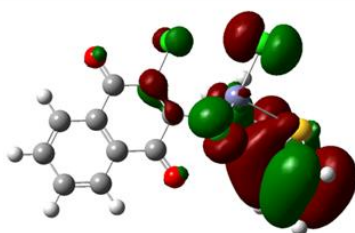

HOMO of R3

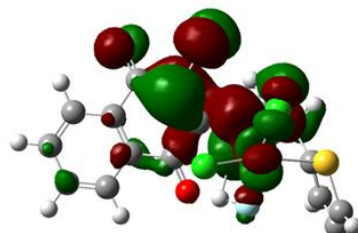HOMO of R3+F<sup>-</sup>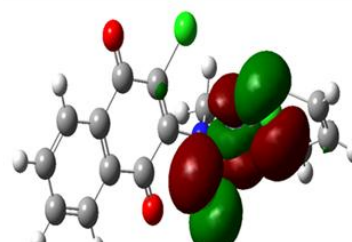

HOMO of R4

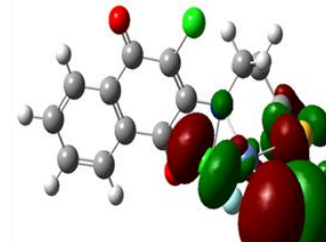HOMO of R4+F<sup>-</sup>

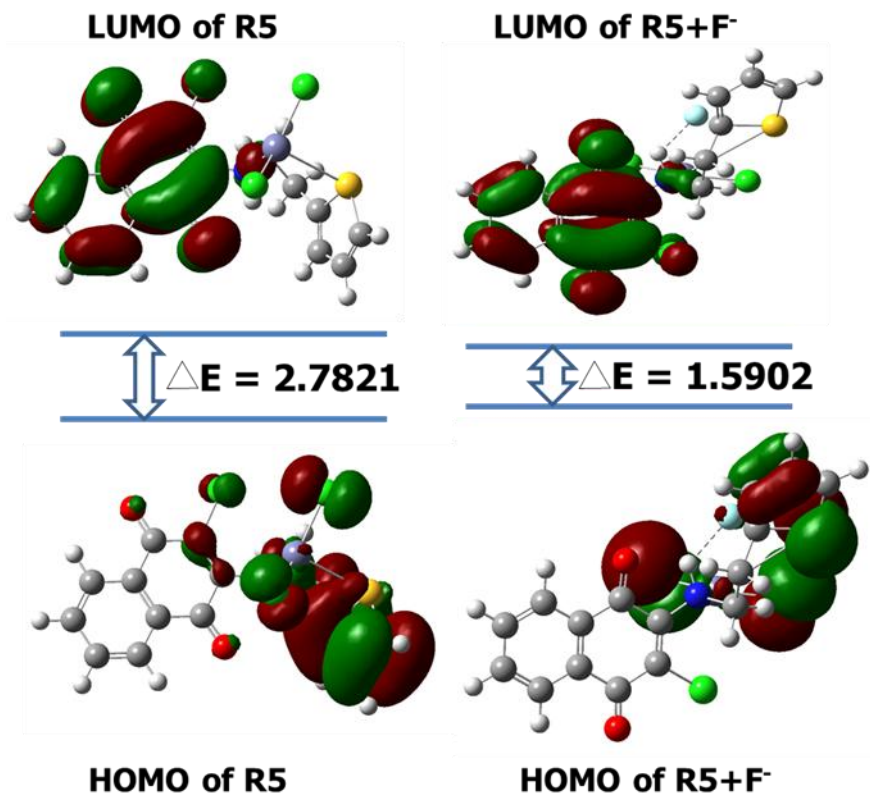

**Fig. S5.** Electron density distribution of HOMO and LUMO of the free Receptors and their F<sup>-</sup> ion complexes.

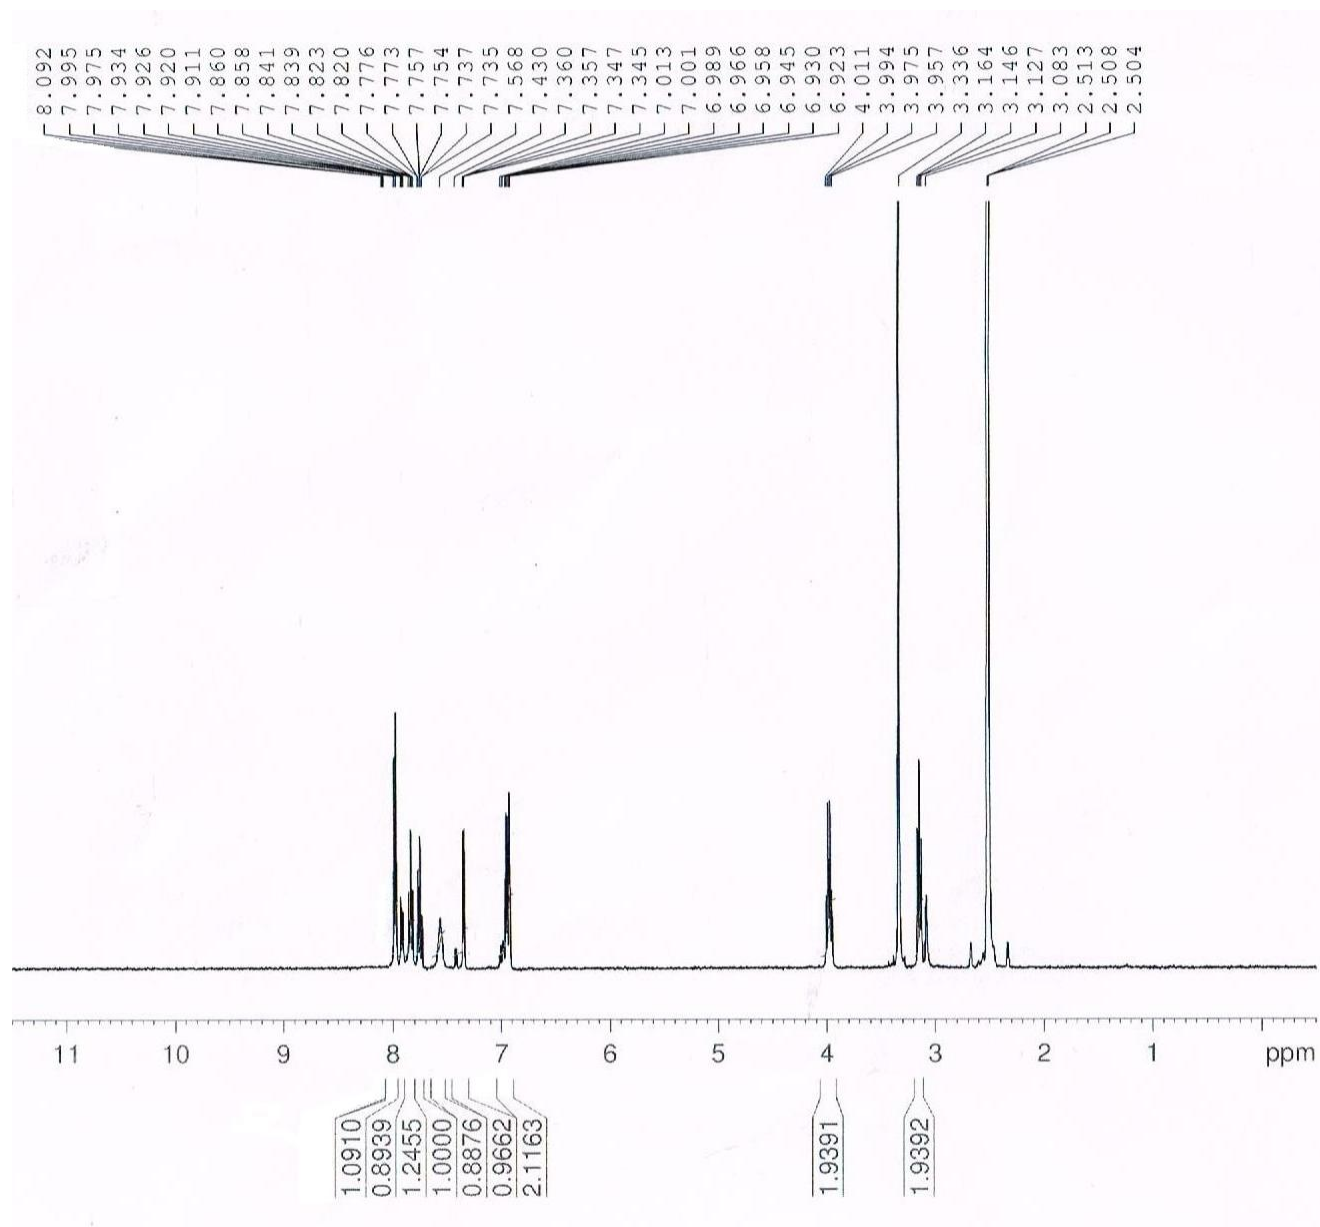

**Fig. S6.**  $^1\text{H}$  NMR spectrum of **R1**

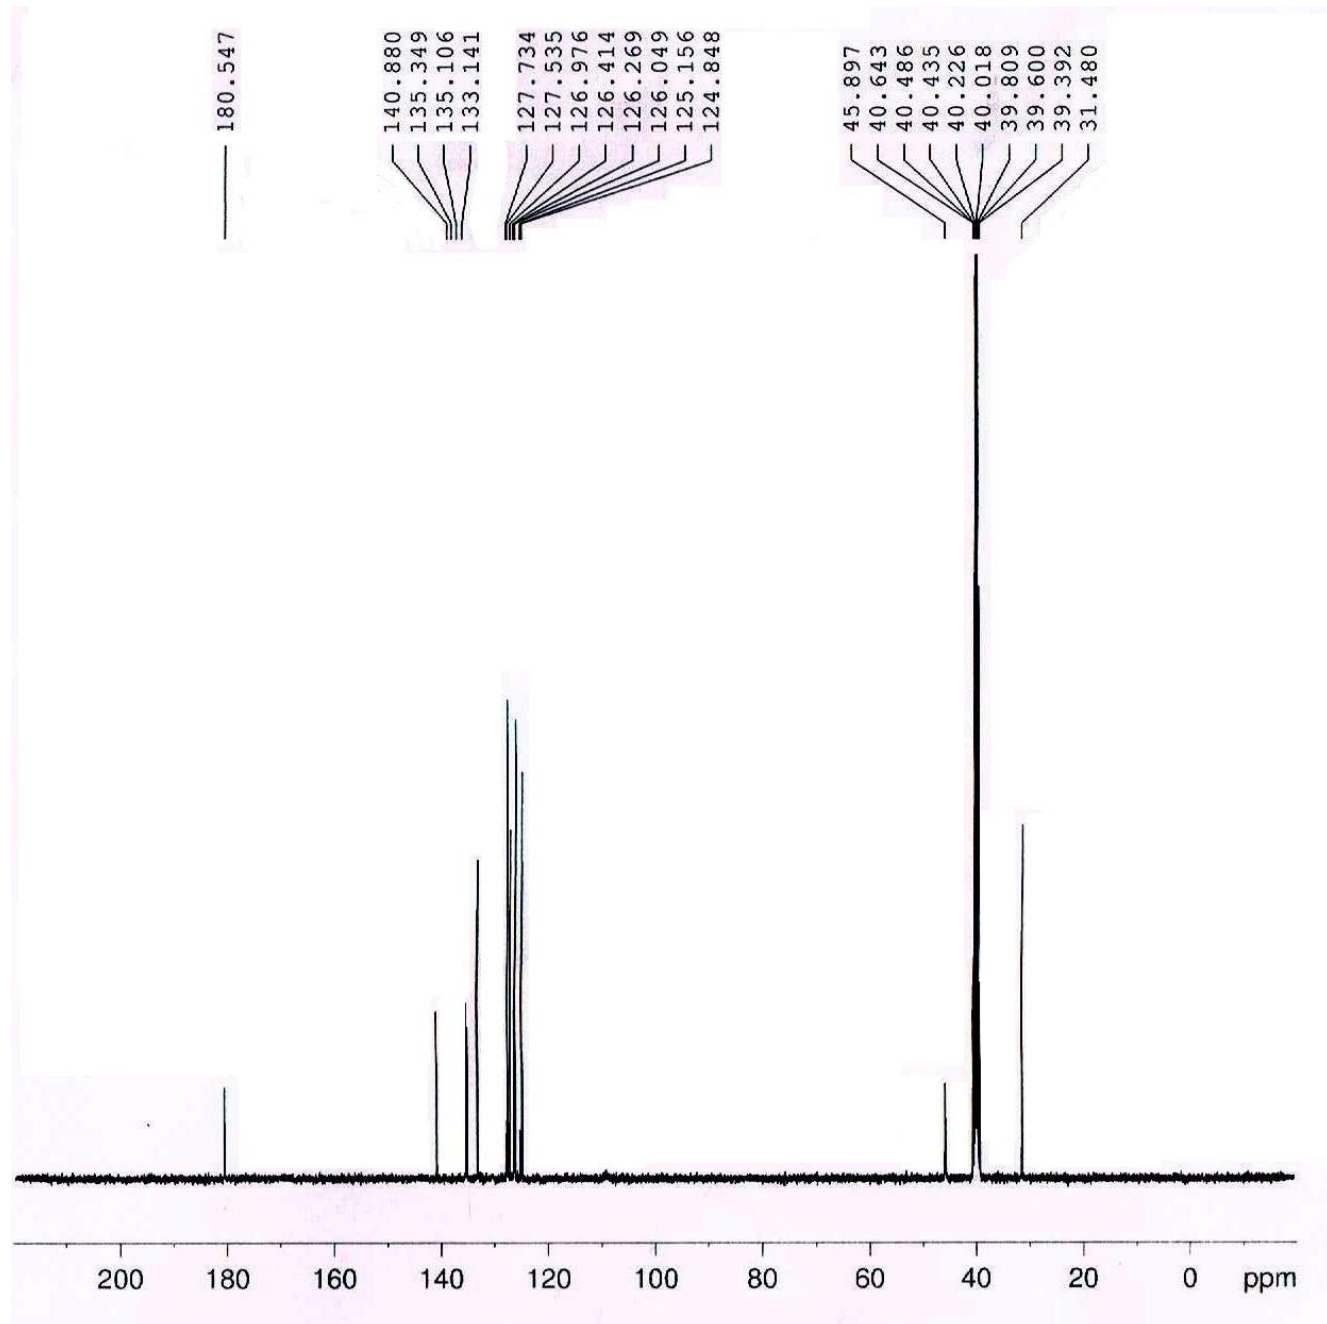

**Fig. S7.**  $^{13}\text{C}$  NMR spectrum of **R1**



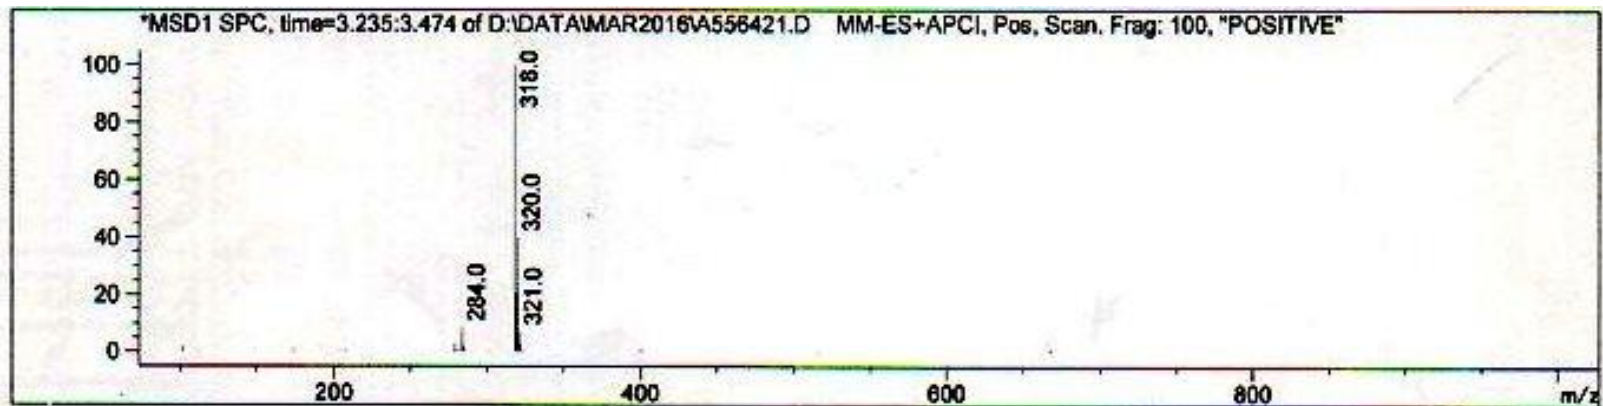

Fig. S8. LCMS spectrum of R1

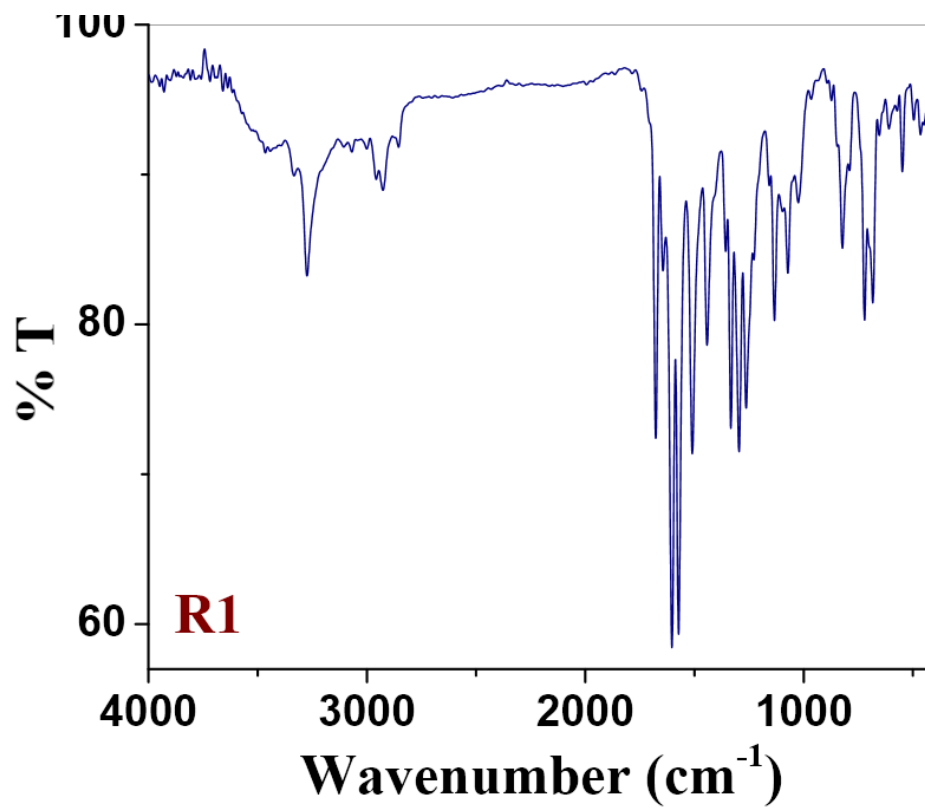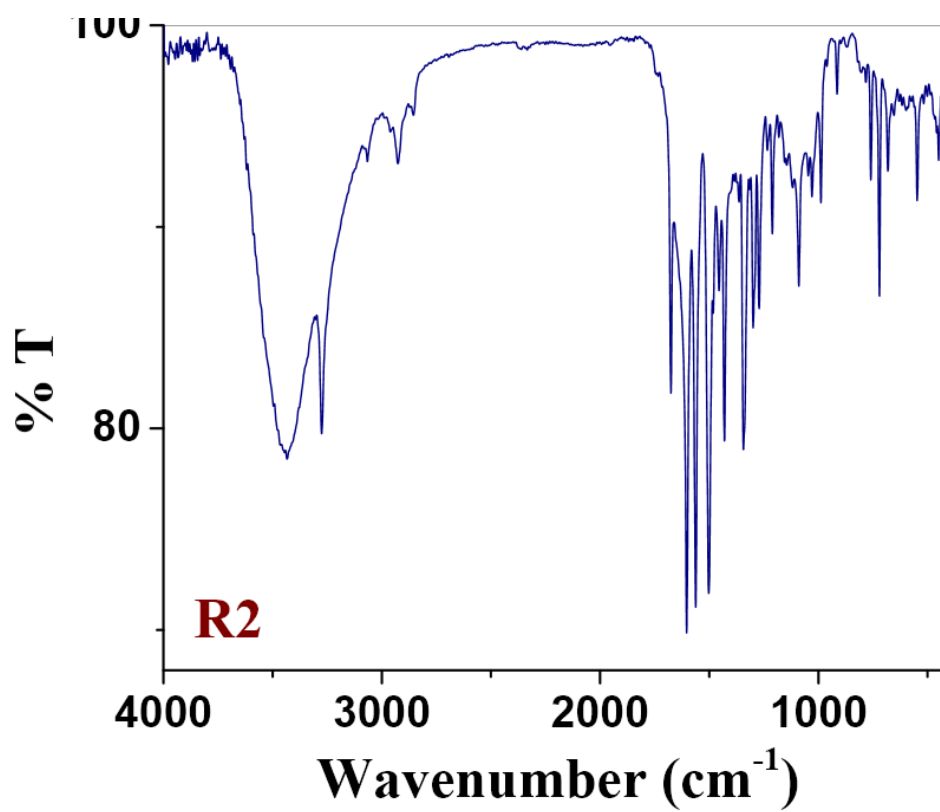

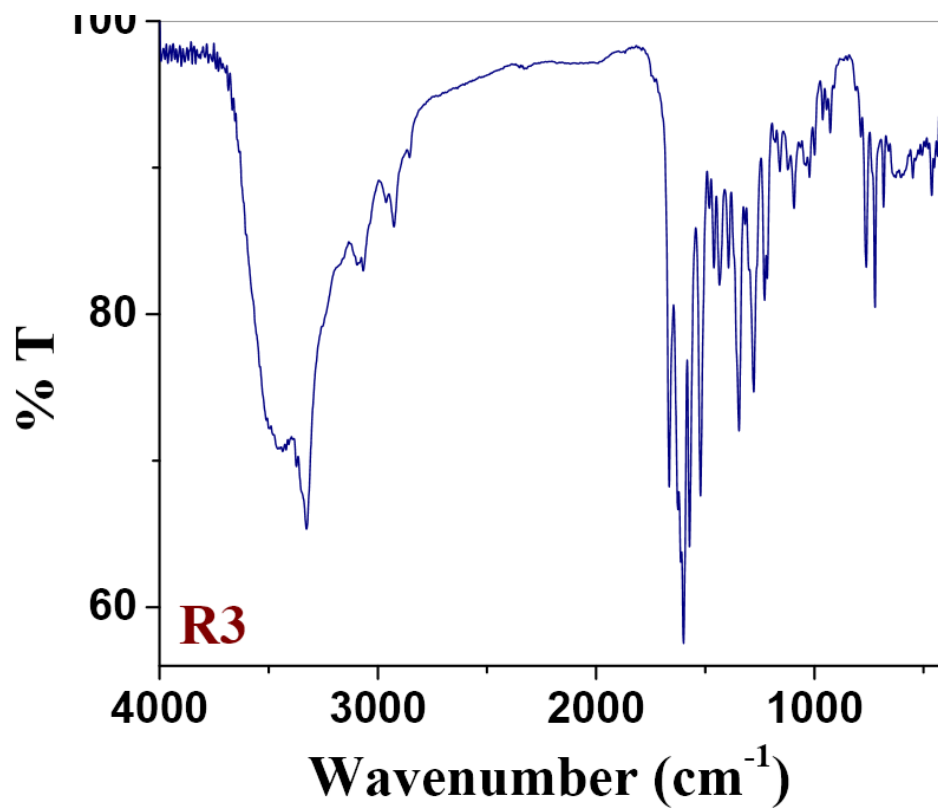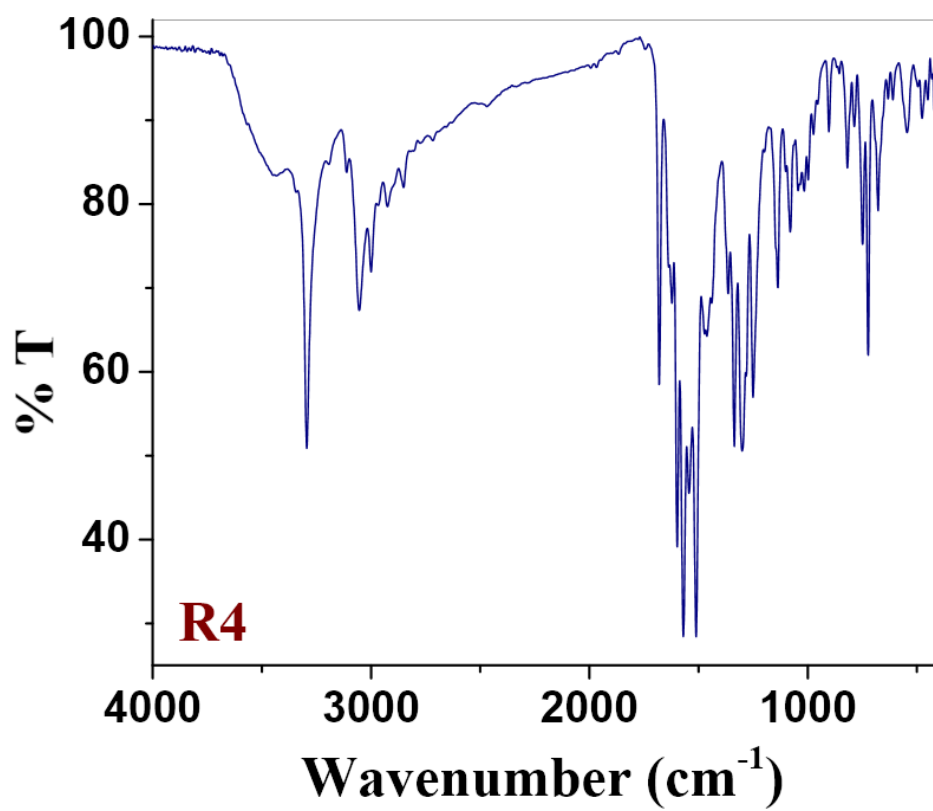

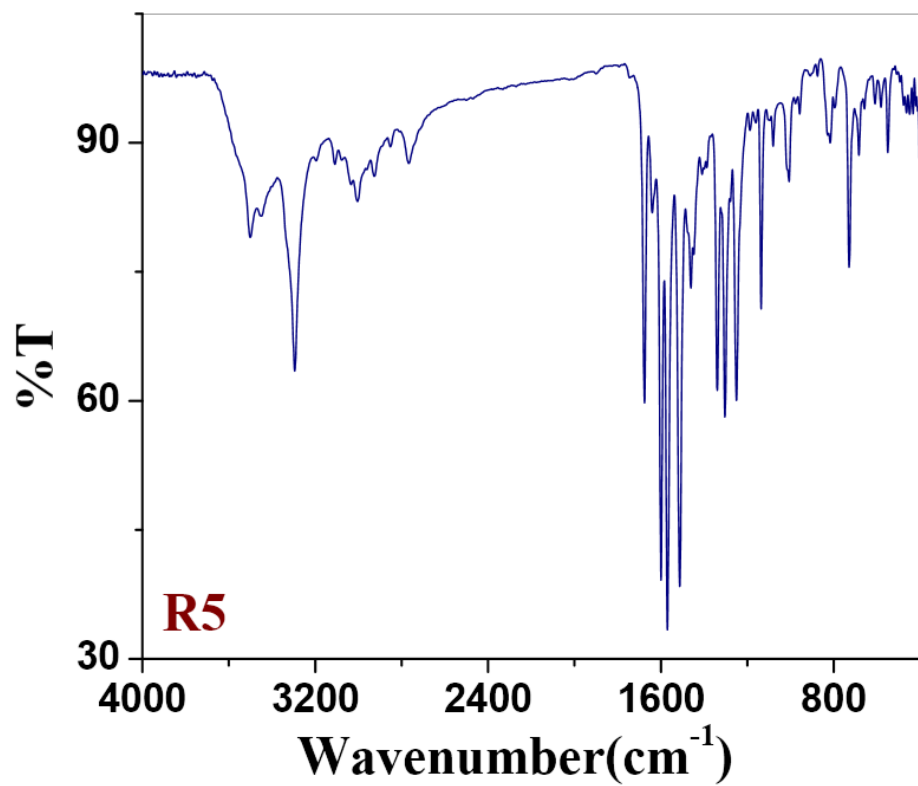

**Fig. S9.** IR spectra of receptors **R1-R5**.

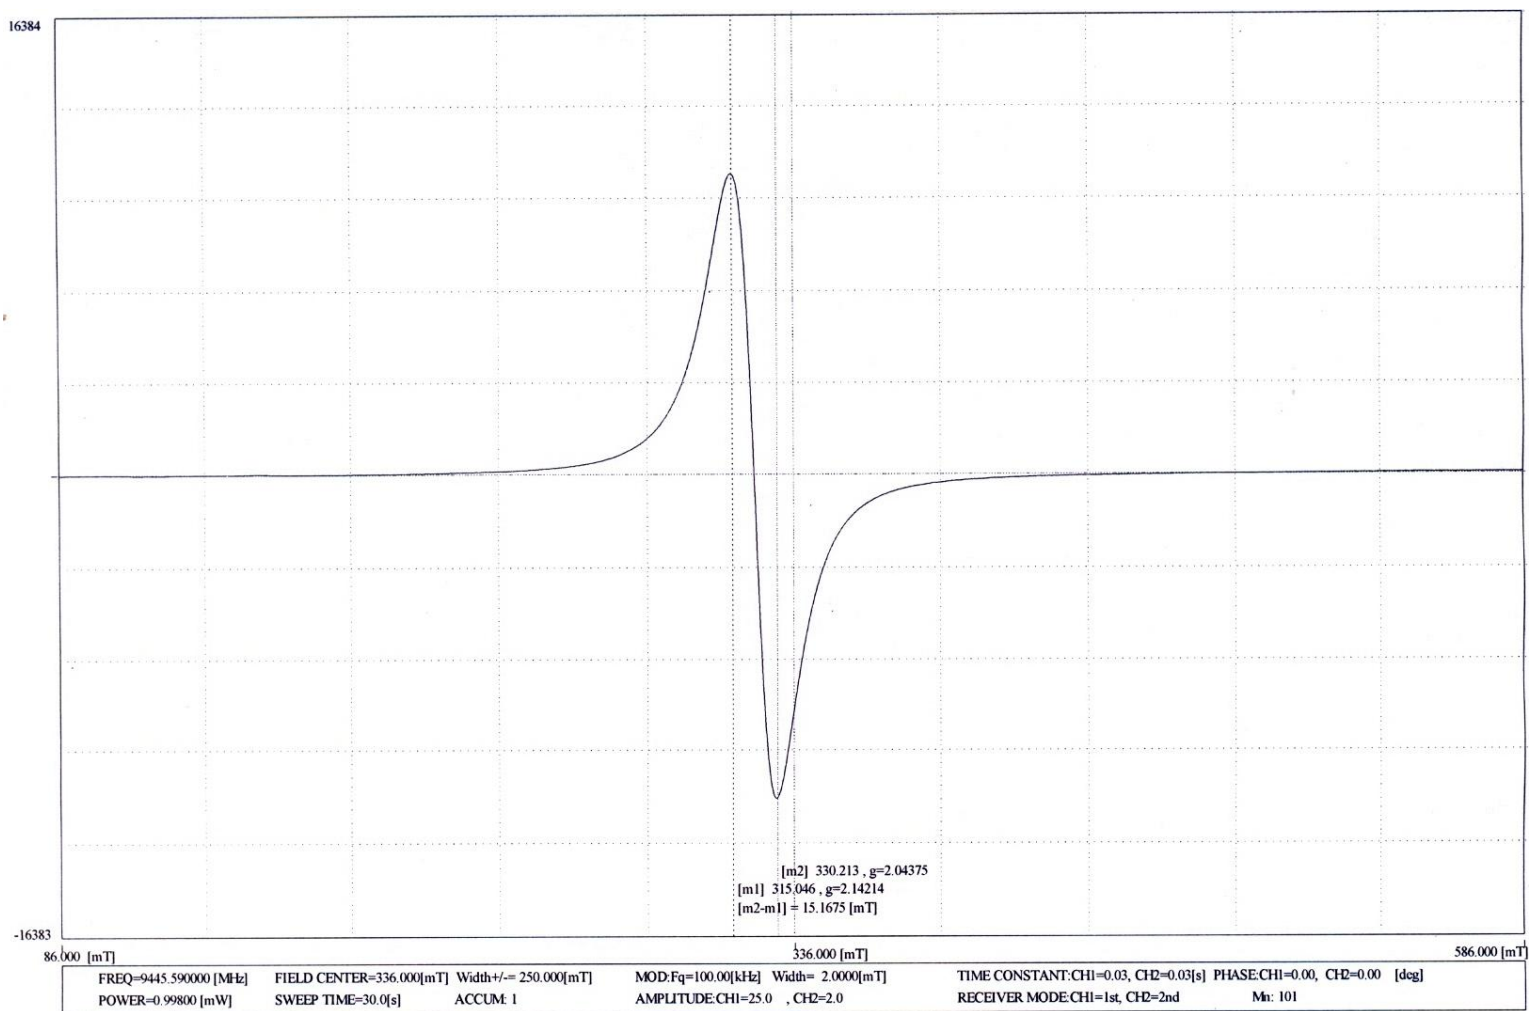

**Fig. S10.** EPR Spectrum of the Cu(II) Complex.

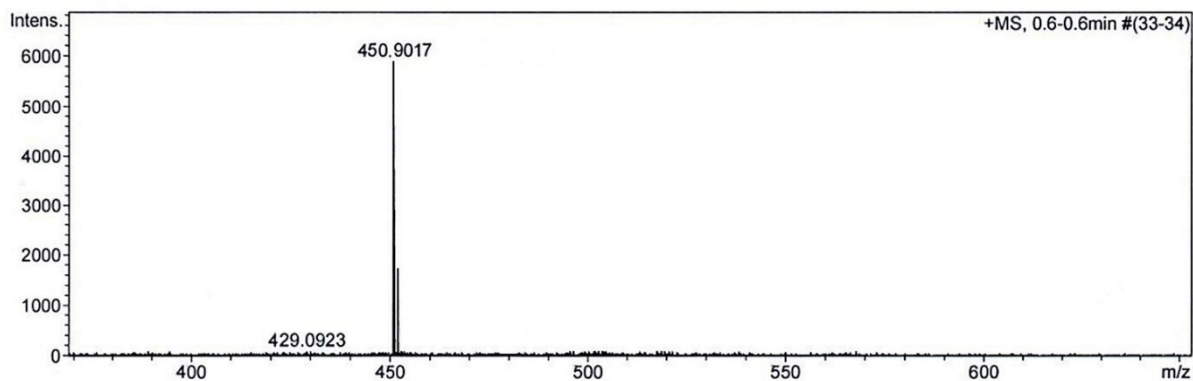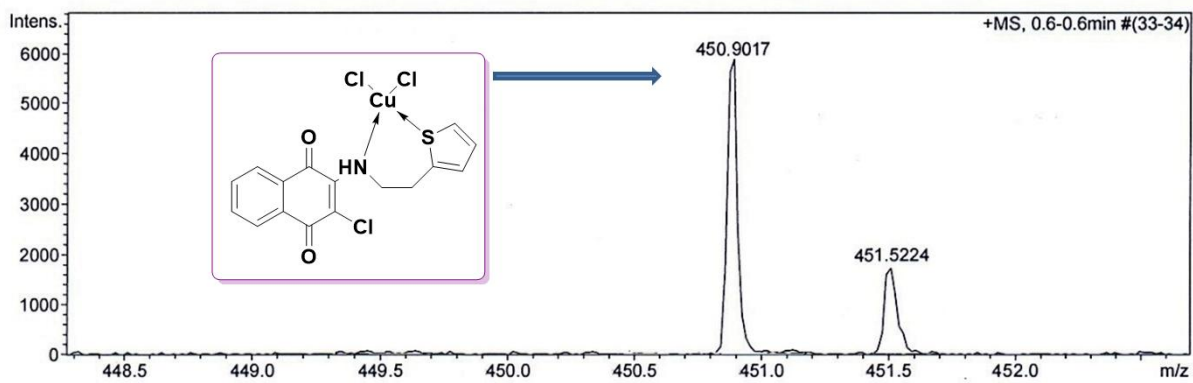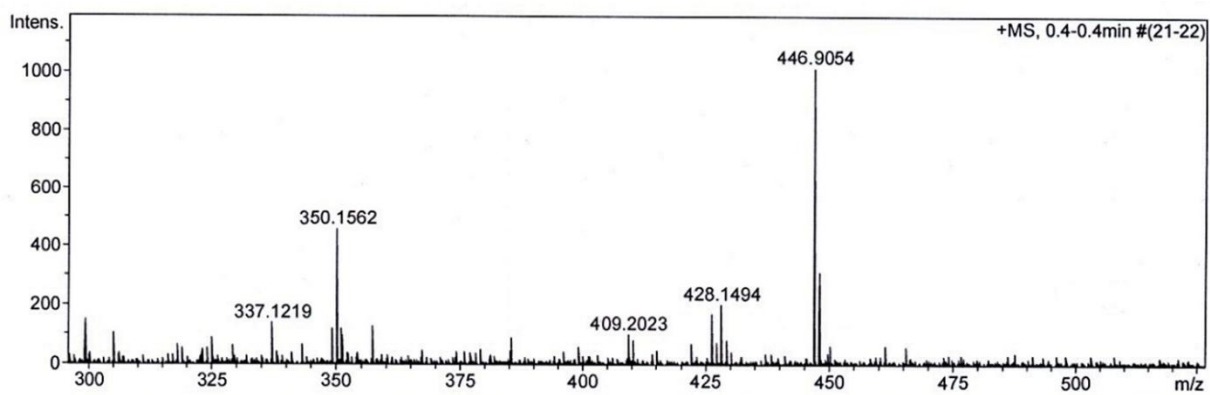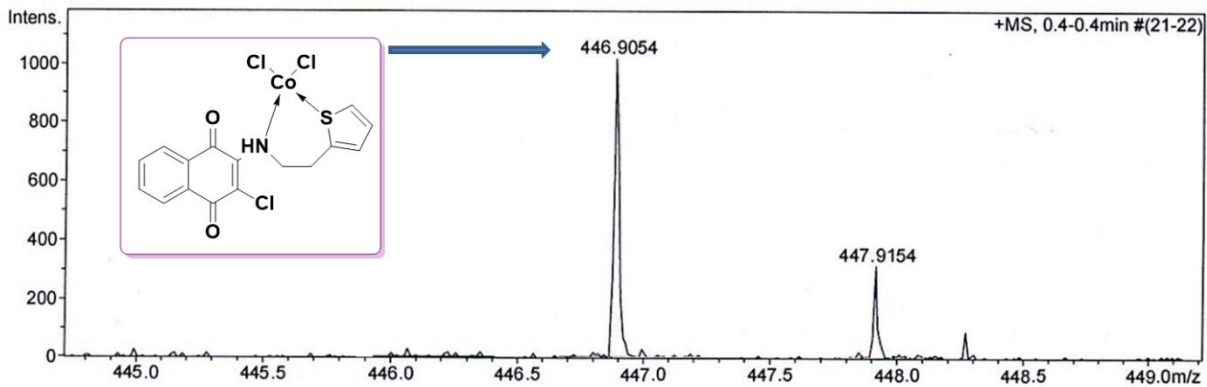

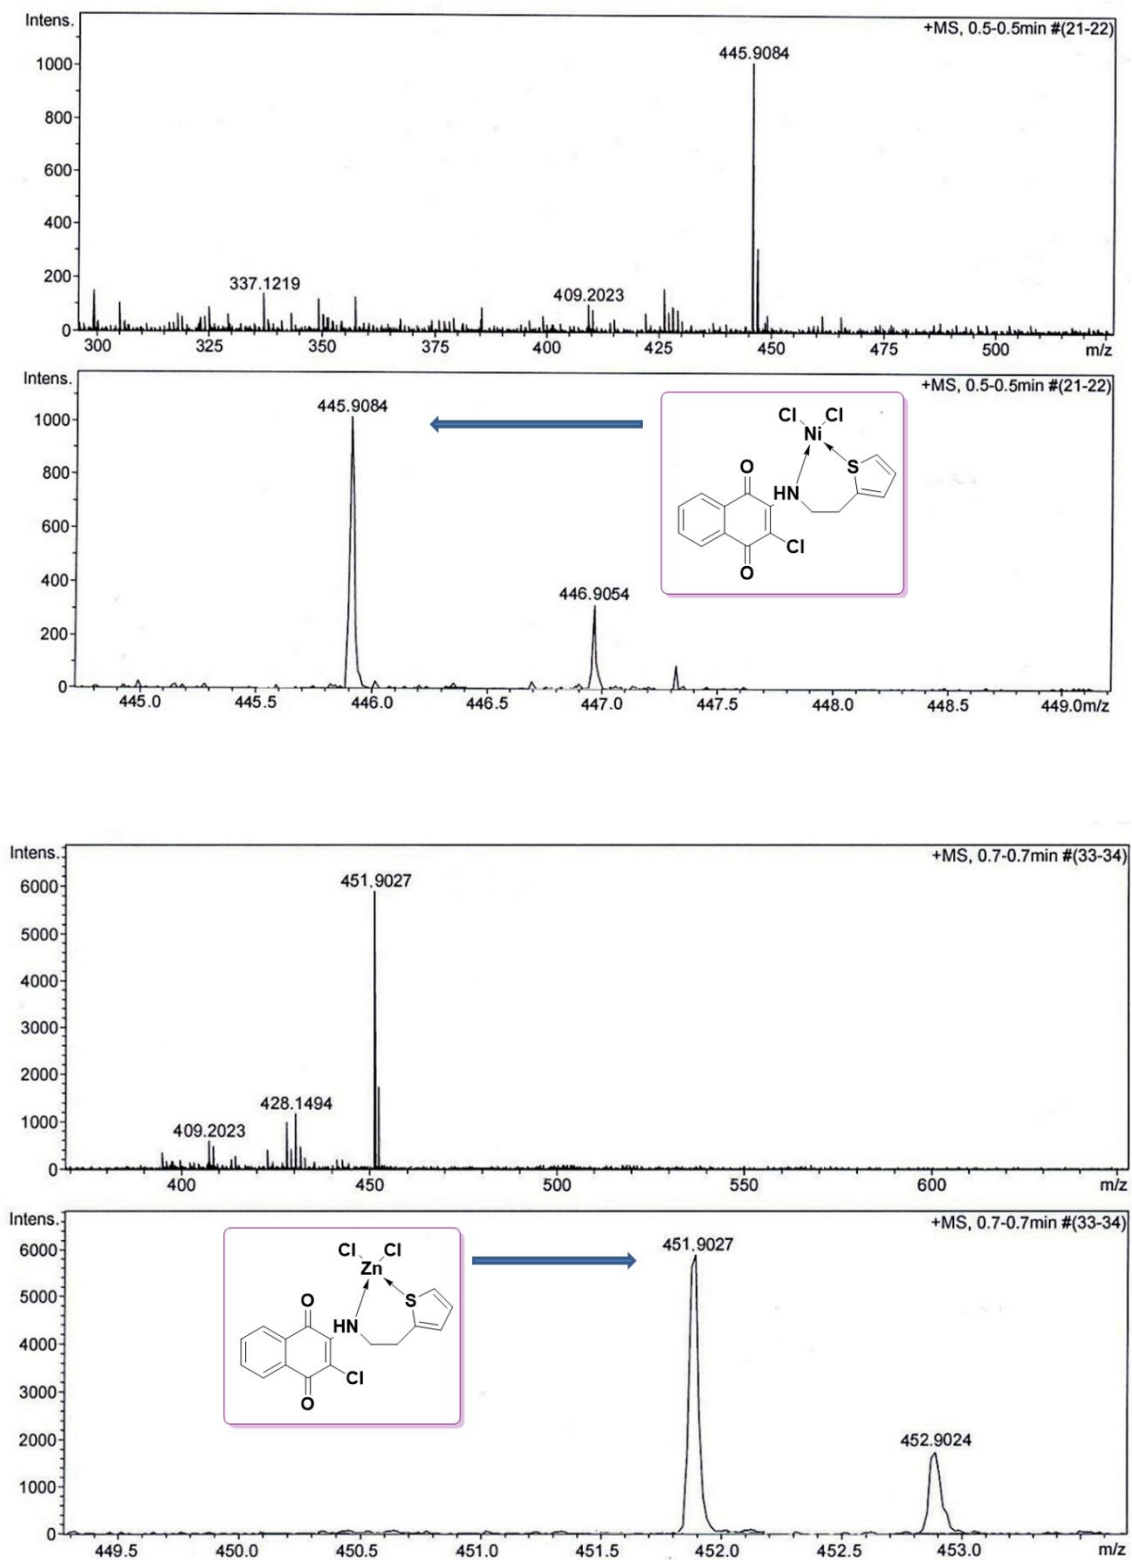

Fig. S11. HRMS spectra of receptors **R2-R5**.

**Table S1.** Crystal data and structure refinement of **R1**.

|                                   |                                                                                                                         |
|-----------------------------------|-------------------------------------------------------------------------------------------------------------------------|
| Empirical formula                 | C <sub>16</sub> H <sub>12</sub> ClNO <sub>2</sub> S                                                                     |
| Formula weight                    | 317.78                                                                                                                  |
| Temperature                       | 293(2) K                                                                                                                |
| Wavelength                        | 0.71073 Å                                                                                                               |
| Crystal system, space group       | Monoclinic, C c                                                                                                         |
| Unit cell dimensions              | a = 23.6442(12) Å    alpha = 90 deg.<br>b = 4.2788(2) Å    beta = 90.614(4) deg.<br>c = 14.2732(7) Å    gamma = 90 deg. |
| Volume                            | 1443.92(12) Å <sup>3</sup>                                                                                              |
| Z, Calculated density             | 4, 1.462 Mg/m <sup>3</sup>                                                                                              |
| Absorption coefficient            | 0.412 mm <sup>-1</sup>                                                                                                  |
| Theta range for data collection   | 4.454 to 29.422 deg.                                                                                                    |
| Limiting indices                  | -30 ≤ h ≤ 31, -5 ≤ k ≤ 5, -18 ≤ l ≤ 19                                                                                  |
| Reflections collected / unique    | 10345 / 3397 [R(int) = 0.0481]                                                                                          |
| Completeness to theta = 26.00     | 100.0 %                                                                                                                 |
| Max. and min. transmission        | 0.905 and 1.255                                                                                                         |
| Refinement method                 | Full-matrix least-squares on F <sup>2</sup>                                                                             |
| Data / restraints / parameters    | 3397/ 2 / 226                                                                                                           |
| Goodness-of-fit on F <sup>2</sup> | 1.042                                                                                                                   |
| Final R indices [I > 2σ(I)]       | R1 = 0.0453                                                                                                             |
| R indices (all data)              | R1 = 0.0586, wR2 = 0.1254                                                                                               |
| Largest diff. peak and hole       | 0.283 and -0.226 e.Å <sup>-3</sup>                                                                                      |



**Table S2.** Bond lengths [Å] and angles [deg] for **R1**.

|            |           |               |          |
|------------|-----------|---------------|----------|
| C11 C9     | 1.736(4)  | C9 C8 C7      | 118.3(3) |
| S1 C16     | 1.697(7)  | C8 C9 C10     | 123.4(4) |
| S1 C13     | 1.703(4)  | C8 C9 C11     | 122.7(3) |
| O2 C7      | 1.215(5)  | C10 C9 C11    | 113.8(3) |
| O1 C10     | 1.228(5)  | C15 C14 C13   | 108.9(4) |
| N1 C8      | 1.337(5)  | C15 C14 H14   | 125.5    |
| N1 C11     | 1.452(5)  | C13 C14 H14   | 125.5    |
| N1 H1N     | 0.82(5)   | O1 C10 C9     | 121.5(4) |
| C8 C9      | 1.372(6)  | O1 C10 C5     | 120.3(4) |
| C8 C7      | 1.522(5)  | C9 C10 C5     | 118.1(3) |
| C9 C10     | 1.442(5)  | O2 C7 C6      | 122.7(3) |
| C14 C15    | 1.415(7)  | O2 C7 C8      | 118.4(3) |
| C14 C13    | 1.432(6)  | C6 C7 C8      | 118.9(3) |
| C14 H14    | 0.93      | C6 C5 C4      | 119.9(4) |
| C10 C5     | 1.487(6)  | C6 C5 C10     | 120.8(3) |
| C7 C6      | 1.462(5)  | C4 C5 C10     | 119.3(4) |
| C5 C6      | 1.390(6)  | N1 C11 C12    | 112.9(3) |
| C5 C4      | 1.394(6)  | N1 C11 H11A   | 110(3)   |
| C11 C12    | 1.527(5)  | C12 C11 H11A  | 106(3)   |
| C11 H11A   | 0.83(5)   | N1 C11 H11B   | 110(2)   |
| C11 H11B   | 1.00(4)   | C12 C11 H11B  | 112(2)   |
| C13 C12    | 1.503(6)  | H11A C11 H11B | 106(4)   |
| C6 C1      | 1.402(6)  | C14 C13 C12   | 126.7(4) |
| C12 H12B   | 1.03(5)   | C14 C13 S1    | 111.2(3) |
| C12 H12A   | 1.25(6)   | C12 C13 S1    | 122.1(3) |
| C1 C2      | 1.380(6)  | C5 C6 C1      | 119.9(4) |
| C1 H1      | 0.90(6)   | C5 C6 C7      | 120.4(3) |
| C4 C3      | 1.377(7)  | C1 C6 C7      | 119.7(4) |
| C4 H4      | 0.89(7)   | C13 C12 C11   | 111.8(3) |
| C2 C3      | 1.394(7)  | C13 C12 H12B  | 111(3)   |
| C2 H2      | 0.94(6)   | C11 C12 H12B  | 116(2)   |
| C3 H3      | 0.90(5)   | C13 C12 H12A  | 101(3)   |
| C15 C16    | 1.329(10) | C11 C12 H12A  | 115(3)   |
| C15 H15    | 0.93      | H12B C12 H12A | 102(3)   |
| C16 H16    | 0.93      | C2 C1 C6      | 119.7(4) |
|            |           | C2 C1 H1      | 116(4)   |
| C16 S1 C13 | 92.4(3)   | C6 C1 H1      | 123(4)   |
| C8 N1 C11  | 131.3(3)  | C3 C4 C5      | 120.0(5) |
| C8 N1 H1N  | 109(4)    | C3 C4 H4      | 122(4)   |
| C11 N1 H1N | 119(4)    | C5 C4 H4      | 118(4)   |
| N1 C8 C9   | 130.7(4)  | C1 C2 C3      | 120.2(4) |
| N1 C8 C7   | 111.0(3)  | C1 C2 H2      | 119(3)   |
|            |           | C3 C2 H2      | 121(3)   |

|             |          |
|-------------|----------|
| C4 C3 C2    | 120.3(4) |
| C4 C3 H3    | 122(3)   |
| C2 C3 H3    | 117(3)   |
| C16 C15 C14 | 115.4(5) |
| C16 C15 H15 | 122.3    |
| C14 C15 H15 | 122.3    |
| C15 C16 S1  | 112.1(4) |
| C15 C16 H16 | 124      |
| S1 C16 H16  | 124      |

---

**Table. S3.** Theoretical data of the receptor and its Complexes.

| Receptors                 | HOMO (eV) | LUMO (eV) | $\Delta E$ (eV) |
|---------------------------|-----------|-----------|-----------------|
| <b>R1</b>                 | -6.0736   | -3.1780   | 2.8956          |
| <b>R1 + F<sup>-</sup></b> | -5.6546   | -2.9723   | 2.6517          |
| <b>R2</b>                 | -6.7158   | -4.1976   | 2.2716          |
| <b>R2 + F<sup>-</sup></b> | -6.7150   | -5.0662   | 1.6487          |
| <b>R3</b>                 | -6.2435   | -3.6687   | 2.5748          |
| <b>R3 + F<sup>-</sup></b> | -6.1335   | -3.8311   | 2.3024          |
| <b>R4</b>                 | -6.0409   | -3.9288   | 2.1121          |
| <b>R4 + F<sup>-</sup></b> | -6.4611   | -5.0072   | 1.4539          |
| <b>R5</b>                 | -6.8431   | -4.0610   | 2.7821          |
| <b>R5 + F<sup>-</sup></b> | -5.7805   | -4.1898   | 1.5902          |

**Table. S4.** Analytical and physical data of Receptores.

| Receptor | Elemental analysis,<br>found (calcd) % |                |                | Molar<br>conductance<br>( $\text{Ohm}^{-1} \text{cm}^2$<br>$\text{mole}^{-1}$ ) | $\mu_{\text{eff}}$ (B.M) |
|----------|----------------------------------------|----------------|----------------|---------------------------------------------------------------------------------|--------------------------|
|          | C                                      | H              | N              |                                                                                 |                          |
| R1       | 60.56<br>(60.47)                       | 3.85<br>(3.81) | 4.43<br>(4.41) | ---                                                                             | ---                      |
| R2       | 42.57<br>(42.49)                       | 2.70<br>(2.67) | 3.12<br>(3.10) | 19                                                                              | 1.74                     |
| R3       | 42.97<br>(42.93)                       | 2.74<br>(2.70) | 3.15<br>(3.13) | 21                                                                              | 2.53                     |
| R4       | 42.99<br>(42.96)                       | 2.76<br>(2.70) | 3.16<br>(3.13) | 16                                                                              | Dia                      |
| R5       | 42.41<br>(42.32)                       | 2.69<br>(2.66) | 3.11<br>(3.08) | 15                                                                              | Dia                      |

**Table. S5.** FT-IR spectral data of the R1 and its complexes (cm<sup>-1</sup>)

| Compound /<br>Complex | N-H  | C=O        | C-S | C-S-C | M-N | M-Cl |
|-----------------------|------|------------|-----|-------|-----|------|
| R1                    | 3274 | 1603, 1677 | 721 | 654   | --- | ---  |
| Cu(II)                | 3292 | 1605, 1679 | 711 | 668   | 462 | 385  |
| Co(II)                | 3323 | 1600, 1672 | 705 | 670   | 455 | 382  |
| Ni(II)                | 3297 | 1604, 1679 | 708 | 667   | 458 | 384  |
| Zn(II)                | 3299 | 1602, 1677 | 707 | 671   | 453 | 383  |

## Characterization of metal complexes

New Cu(II), Co(II), Ni(II) and Zn(II) complexes of the receptor **R1** were synthesized and characterized using analytical and spectral techniques. The complexes were found to be stable in air and soluble in DMF and DMSO. The analytical data of the receptor **R1** and its complexes are summarized in Table S4. The elemental analysis results suggested that the general formula of the complexes is  $[M(\mathbf{R1})Cl_2]$  {where M= Cu(II), Co(II), Ni(II) and Zn(II)}. The molar conductivity data for 1 mM DMF solutions of the complexes suggested that they are non-electrolyte in nature.<sup>1</sup> The major bands observed in the FT-IR spectra of **R1** and its metal complexes are listed in Table S5. The FT-IR spectra of the complexes were compared with that of free **R1** (Fig. S9) in order to ascertain the mode of coordination of **R1** with the metal ions. The FT-IR spectrum of the free **R1** exhibited characteristic absorption bands at 1603 and 1677  $\text{cm}^{-1}$  due to C=O stretching. The two bands observed for the  $\nu(\text{C=O})$  is well supported by the two different lengths of the C=O bond as shown in the crystal structure of **R1**. In the complexes, these bands remained almost unchanged suggesting non-involvement of the carboxyl oxygen in complexation with the metal ions.<sup>2</sup> The band at 3274  $\text{cm}^{-1}$  which corresponds to N-H stretching in the FT-IR spectrum of free **R1** was shifted upwards by 18-49  $\text{cm}^{-1}$  in all the complexes indicating the coordination of the N-atom to the metal ions.<sup>19</sup> Additional bands in the region 453-462  $\text{cm}^{-1}$  and 382-385  $\text{cm}^{-1}$  in these complexes have tentatively been assigned to  $\nu(\text{M-N})$  and  $\nu(\text{M-Cl})$  modes, respectively.<sup>20</sup> The shift of  $\nu(\text{C-S})+\delta(\text{ring})$  to lower wavenumbers and the shift of  $\nu(\text{C-S-C})$  to higher wavenumbers in the complexes, when compared to that in free **R1** have suggested the coordination of **R1** through thiophene ring.<sup>3</sup>

The electronic spectrum of **R1** in DMF exhibited a band at 469 nm ( $\log \epsilon = 3.47$ ) characteristic of the ICT transition from N-H group (donor) to quinone moiety (acceptor).<sup>4</sup> In all

the complexes this band has experienced a blue shift of 2-10 nm. This is due to the fact that coordination of the N-atom with the metal ion would remove the electron density on the N-atom and thereby makes the ICT transition relatively difficult which consequently shifts the band hypsochromically. This observation strongly supported the coordination of the N-atom (of N-H group) with the metal ions as discussed in the FT-IR spectral studies. The electronic spectrum of [Cu(**R1**)Cl<sub>2</sub>] showed a broad band at 608 nm assignable to  ${}^2B_{1g} \rightarrow {}^2A_{1g}$  transition which corresponds to a square planar geometry around the Cu(II) ion. The observed magnetic moment of 1.74 BM further supported the electronic spectral results.<sup>19</sup> The EPR spectrum of the Cu(II) complex in solid state at 298 K exhibited axial signals with two g-values,  $g_{\parallel} = 2.1421$  and  $g_{\perp} = 2.0437$  (Fig. S10). In square planar complexes the unpaired electron lies in  $d_{x^2-y^2}$  orbital giving  ${}^2B_{1g}$  as the ground state with  $g_{\parallel} > g_{\perp}$ . In the present case, the observed trend  $g_{\parallel} > g_{\perp} > g_e (2.0023)$  confirmed the square planar nature of [Cu(**R1**)Cl<sub>2</sub>].<sup>5</sup>

The electronic spectrum of [Co(**R1**)Cl<sub>2</sub>] exhibited two bands at 604 and 672 nm assignable to  ${}^4A_{2g} \rightarrow {}^4T_{1g}^{(P)}$  and  ${}^4A_{2g} \rightarrow {}^4T_{1g}^{(F)}$  transitions, respectively suggesting a square planar geometry for the complex. The observed magnetic moment of 2.53 BM further corroborated the electronic spectral finding.<sup>20,6</sup> The diamagnetic nature of [Ni(**R1**)Cl<sub>2</sub>] revealed by magnetic moment studies confirmed the square planar environment around the Ni(II) ion.<sup>7</sup> The Zn(II) complex was found to be diamagnetic as expected for  $d^{10}$  configuration. The shifts observed in the FT-IR bands when compared to that of free **R1** indicated the coordination of the S- and N-atoms from the **R1** and two chloride ions from the metal salt making up a four coordination sphere for the tetrahedral coordinated geometry.<sup>8</sup> The HRMS spectra of the complexes were recorded and are depicted in figure. S11, which confirmed the proposed formulae.

- 1 S. Madhupriya and K. P. Elango, *Synth. React. Inorg. Met-Org and Nano-Met. Chem.*, 2014, **44**, 1104-1119.
- 2 C. Parthiban and K. P. Elango, *Sens. Actuators B*, 2016, **237**, 284-290.
- 3 F. Hamurcu, A. B. Gunduzalp, S. Cete and B. Erk, *Transition Met. Chem.*, 2008, **33**, 137-141.
- 4 A. Satheshkumar, K. Ganesh and K. P. Elango, *New J. Chem.*, 2014, **38**, 993-1003.
- 5 V. P. Singh, S. Singh, D. P. Singh, K. Tiwari and M. Mishra, *J. Mol. Struct.*, 2014, **1058**, 71-78.
- 6 E. Kent Barefield, D. H. Busch and S. M. Nelson, *Q. Rev. Chem. Soc.*, 1968, **22**, 457-498.
- 7 J. P. Barbier, A. E. Biyyadh, C. Kappenstein, N. D. Mabiala and R. P. Hugel, *Inorg. Chem.*, 1985, **24**, 3615-3620.
- 8 P. Tyagi, S. Chandra and B. S. Saraswat, *Spectrochim. Acta A*, 2015, **134**, 200-209.
